# Supplementary material for: Hormone-sensitive lipase couples intergenerational sterol metabolism to reproductive success
Source: eLife. 2021 Feb 4;10:e63252. doi: 10.7554/eLife.63252 (PMC7880688; doi:10.7554/eLife.63252)
Supplement: Supplementary file 1. [file elife-63252-supp1.xlsx]

## Sheet: lipid classes
	pmol lipid/embryo
Genotype:	Control	Control	Hsl1	Hsl1	Control vs. Hsl1	Control	Control	Hsl1	Hsl1	Control vs. Hsl1	Control	Control	Hsl1	Hsl1	Control vs. Hsl1
time AEL:	0-2h	0-2h	0-2h	0-2h	0-2h	6-8h	6-8h	6-8h	6-8h	6-8h	18-20h	18-20h	18-20h	18-20h	18-20h
Lipid class	Mean	SD	Mean	SD	q value	Mean	SD	Mean	SD	q value	Mean	SD	Mean	SD	q value
PC	67.9527	5.37337	67.1289	7.66388	0.957209	76.4943	8.17192	71.9407	7.10726	0.571176	83.4091	12.1093	77.9146	5.43822	0.571176
PC O-	0	0	0	0		0	0	0	0		0	0	0	0
LPC	0.580762	0.159866	0.40656	0.0792277	0.131829	0.67376	0.176611	0.649541	0.250855	0.957209	0.707338	0.197834	0.597794	0.190687	0.571176
LPC O-	0	0	0	0		0	0	0	0		0	0	0	0
PE	110.63	10.9884	112.325	14.2203	0.957209	131.706	12.9318	127.943	13.3127	0.900124	139.353	22.2983	138.238	15.7995	0.974012
PE O-	0.500972	0.0671018	0.456657	0.0877042	0.571176	0.584553	0.0531082	0.535127	0.0969161	0.571176	2.27466	0.380465	2.31919	0.21412	0.957209
LPE	2.36038	0.484833	1.73247	0.248218	0.08303	3.69855	0.971888	3.54426	1.59457	0.957209	3.59161	1.02871	2.88971	0.98437	0.571176
CerPE	4.00948	0.327851	4.31082	0.595472	0.571176	6.36525	0.598176	6.27176	0.706742	0.957209	8.5716	1.40417	8.85144	0.99905	0.957209
PA	0.206381	0.0259917	0.160192	0.0375995	0.131829	0.136321	0.0136409	0.131499	0.0545094	0.957209	0.168741	0.0238305	0.122361	0.027458	0.054381
LPA	0.0247994	0.0365013	0.00272958	0.00722178		0	0	0	0		0.00356301	0.00942684	0.018328	0.0435972
PG	4.12972	0.530968	4.13729	0.593284	0.980294	4.00675	0.440044	3.71215	0.410962	0.571176	3.82708	0.567842	3.66241	0.259127	0.794573
LPG	0	0	0	0		0	0	0	0		0	0	0	0
PI	19.0392	1.27666	19.2095	1.60212	0.957209	22.952	1.31729	22.1786	2.19092	0.748809	25.5714	3.67745	25.3443	2.4093	0.974012
LPI	0.861275	0.338222	0.641196	0.193314	0.538967	1.07256	0.341079	0.843691	0.35534	0.571176	1.29086	0.398859	1.32709	0.532223	0.974012
PS	25.2772	3.2313	26.3766	3.82508	0.883393	36.2682	5.71169	33.0012	6.69664	0.609306	38.9558	7.99961	40.0166	6.46768	0.957209
LPS	0.310754	0.132168	0.217007	0.0529052	0.381704	0.563327	0.161759	0.457429	0.187816	0.571176	0.589934	0.187867	0.584278	0.35231	0.980294
Cer	1.3353	0.26015	1.43797	0.26998	0.794573	2.39406	0.186372	2.63278	0.207886	0.214009	2.3361	0.34712	2.55754	0.325391	0.571176
CL	0	0	0	0		0	0	0	0		0	0	0	0
DG	4.67032	0.480962	5.58723	0.809572	0.131829	3.99106	0.278474	4.26093	0.277645	0.36351	6.06531	1.02458	5.25769	0.572335	0.36351
TG	298.833	65.1796	301.531	52.9217	0.974012	262.542	38.8798	225.506	28.4763	0.294918	124.796	24.0268	110.269	12.8045	0.571176
Sterol	12.4004	0.818941	7.74957	0.711751	<0,000001	18.582	1.586	8.53809	0.459382	<0,000001	20.6466	2.42541	11.5802	0.812116	1e-06

## Sheet: chain length and saturation
			% of lipid class
Genotype:			Control	Control	Hsl1	Hsl1	Control vs. Hsl1	Control	Control	Hsl1	Hsl1	Control vs. Hsl1	Control	Control	Hsl1	Hsl1	Control vs. Hsl1
time AEL:			0-2h	0-2h	0-2h	0-2h	0-2h	6-8h	6-8h	6-8h	6-8h	6-8h	18-20h	18-20h	18-20h	18-20h	18-20h
Lipid	combined acyl chain length	combined double bonds	Mean	SD	Mean	SD	q value	Mean	SD	Mean	SD	q value	Mean	SD	Mean	SD	q value
PC	26		0.462537	0.0245921	0.433782	0.0327002	0.274821	0.560631	0.0407628	0.49472	0.0414708	0.04019	0.661127	0.0348558	0.510459	0.0274075	1.9e-05
PC	28		0.675446	0.0419377	0.670342	0.0506536	0.970935	0.934156	0.0640772	0.882766	0.0650683	0.418399	1.16778	0.0844522	1.04027	0.0533854	0.021513
PC	30		5.6805	0.224087	4.98511	0.184295	0.000366	5.89806	0.226244	4.83784	0.156258	8e-06	6.06874	0.309044	5.41957	0.410288	0.021513
PC	32		47.4319	0.689944	45.7771	0.832426	0.007447	47.1139	1.9737	45.409	0.672477	0.166797	42.6586	1.54605	41.4111	1.6706	0.437326
PC	34		38.7098	0.665646	40.3471	0.598582	0.002909	38.3645	1.24234	40.414	0.727871	0.011883	39.8504	1.07132	41.3318	1.14656	0.096151
PC	36		7.03985	0.38764	7.78658	0.261508	0.005865	7.12871	0.867663	7.96164	0.272776	0.107774	9.59336	0.798858	10.2868	0.964242	0.43089
PC	38		0	0	0	0		0	0	0	0		0	0	0	0
PC		0	0.65879	0.0349747	0.628145	0.0409146	0.418399	0.963295	0.0531712	0.848429	0.0535515	0.007474	1.08308	0.0516843	0.880639	0.0533755	0.00013
PC		1	27.8779	0.548432	27.7298	0.324988	0.872776	28.9745	0.639677	29.4136	0.224411	0.330522	27.9919	0.524077	27.4888	0.86119	0.510947
PC		2	63.4827	0.998049	63.6472	1.11596	0.943986	60.1228	1.71902	59.4846	1.16781	0.807111	56.6126	1.39433	56.6055	1.47413	0.998113
PC		3	6.84221	1.12074	6.84339	0.803446	0.998113	8.5162	1.85934	8.7825	0.792259	0.934805	12.2562	1.52304	12.7598	1.85395	0.893613
PC		4	1.11821	0.242297	1.13013	0.172393	0.995621	1.38754	0.340731	1.43369	0.189368	0.940744	1.96671	0.311656	2.16465	0.452948	0.757501
PC		5	0.0201404	0.0215413	0.0213331	0.018815	0.995621	0.0356513	0.0358719	0.0372406	0.0244885	0.995621	0.0894775	0.0361189	0.100591	0.0550336	0.91807
PC		6	0	0	0	0		0	0	0	0		0	0	0	0
PE	26		0.969109	0.0943225	0.946647	0.0840475	0.904986	1.40899	0.109476	1.54733	0.140684	0.19727	0.78076	0.104379	0.752515	0.0669734	0.872776
PE	28		0.926194	0.057008	0.879785	0.0658324	0.458171	1.29364	0.086105	1.37867	0.0925144	0.305067	0.945061	0.0617621	0.953518	0.0738704	0.970935
PE	30		3.23207	0.17356	2.92061	0.146792	0.014686	3.43128	0.153814	3.07379	0.0854868	0.001388	2.98636	0.207706	2.80309	0.219616	0.380009
PE	32		32.3153	0.902447	31.3382	0.82872	0.180249	29.3105	0.557305	27.5527	0.758868	0.00261	24.9128	0.933956	24.474	0.980911	0.786741
PE	34		46.6703	1.00321	46.0661	1.14111	0.690553	47.2553	0.88439	48.7828	1.46727	0.120589	51.2384	1.3274	51.3876	1.32299	0.970935
PE	36		15.8355	0.52682	17.7939	0.542434	0.000186	17.2378	0.436283	17.5979	0.884537	0.757501	19.0162	0.620732	19.5052	0.368237	0.302707
PE	38		0.0515167	0.0146254	0.0547927	0.00649153	0.893613	0.0624837	0.00527982	0.0667427	0.00995975	0.73451	0.120312	0.0114788	0.124085	0.0152655	0.893613
PE		0	1.43049	0.11763	1.3843	0.112548	0.834918	2.14267	0.18824	2.44757	0.190875	0.04019	1.29096	0.150327	1.32928	0.136423	0.895082
PE		1	53.4524	0.684386	52.5132	0.367143	0.027657	55.6086	0.796821	56.252	0.728563	0.39123	55.4275	0.784683	55.8128	0.874007	0.786101
PE		2	40.664	0.374394	41.6207	0.435426	0.004846	37.5437	0.382875	36.5758	0.187678	0.000564	36.5354	0.247304	35.9764	0.297806	0.011022
PE		3	3.86146	0.646575	3.87475	0.540988	0.998113	4.1023	0.834043	4.11957	0.452728	0.998113	5.81209	0.771433	5.91003	0.96465	0.970935
PE		4	0.579329	0.0935217	0.593102	0.0801095	0.943986	0.586719	0.122733	0.592163	0.0805741	0.995621	0.892133	0.144644	0.924639	0.221936	0.934805
PE		5	0.012351	0.0100452	0.0139279	0.00945607	0.943986	0.0159394	0.0115704	0.0128528	0.0117732	0.895082	0.0419369	0.0122372	0.0468273	0.0205327	0.893613
PE		6	0	0	0	0		0	0	0	0		0	0	0	0
PI	26		0.142084	0.0961939	0.104188	0.0954846	0.834918	0	0	0.0168525	0.047666	0.757501	0	0	0	0
PI	28		0.311607	0.0454464	0.316691	0.0579392	0.974666	0.226471	0.0251439	0.242626	0.0583993	0.849749	0.242339	0.0280538	0.237445	0.0261302	0.934805
PI	30		2.86101	0.20526	2.61671	0.0801935	0.045064	3.60456	0.46497	3.2967	0.146572	0.347839	2.79451	0.241426	2.73723	0.274218	0.91807
PI	32		26.8604	1.14505	25.3579	0.476211	0.027657	26.0214	1.79383	24.7742	0.673512	0.330522	21.1566	1.22951	20.8322	1.13209	0.895082
PI	34		49.9634	0.499905	49.688	0.639407	0.776271	47.6636	0.253052	47.9632	0.715444	0.691719	46.7313	1.20972	46.2663	1.13189	0.834918
PI	36		19.8242	1.34245	21.8714	0.890354	0.021513	22.4327	2.03699	23.6548	1.01245	0.454508	28.8581	2.42427	29.6685	2.02001	0.849749
PI	38		0.0373716	0.044832	0.0451225	0.0412781	0.934805	0.0512842	0.0122003	0.0516515	0.0305581	0.998113	0.217171	0.0332747	0.258267	0.0188253	0.051844
PI		0	0.316524	0.119771	0.268877	0.115513	0.834918	0.0709046	0.0150083	0.0944275	0.0962194	0.855408	0.0758829	0.0217253	0.0607991	0.0201037	0.498107
PI		1	28.2984	1.18058	28.3339	0.711248	0.998113	24.4342	2.21099	23.8151	0.697698	0.849749	19.5646	1.202	19.791	0.888453	0.91807
PI		2	50.7448	1.29083	51.6113	1.11958	0.498107	50.1311	1.22103	50.3602	0.967055	0.92288	47.4129	1.87752	47.043	1.96315	0.934805
PI		3	17.6656	1.94231	17.0011	1.24324	0.834918	21.606	2.8575	21.9927	1.29052	0.934805	27.0702	2.20616	27.1457	1.91338	0.998113
PI		4	2.97467	0.27338	2.78481	0.179135	0.404208	3.75775	0.55595	3.73759	0.282361	0.998113	5.86488	0.701867	5.95947	0.819314	0.970935
PI		5	0	0	0	0		0	0	0	0		0.0114112	0.0322757	0	0	0.757501
PI		6	0	0	0	0		0	0	0	0		0	0	0	0
PS	26		0.180349	0.0957079	0.192991	0.095873	0.970935	0.200815	0.0758368	0.189422	0.0703807	0.943986	0.105102	0.0562365	0.0900445	0.056006	0.895082
PS	28		0.683402	0.085699	0.678222	0.0733878	0.995621	0.963056	0.11869	1.01163	0.105714	0.807111	0.48295	0.113522	0.490742	0.141554	0.995621
PS	30		0.968105	0.154199	0.859784	0.115251	0.418399	1.30271	0.103871	1.27795	0.0687476	0.893613	0.954571	0.146798	0.973384	0.183421	0.970935
PS	32		5.51078	0.153668	4.77517	0.183661	4.3e-05	5.26815	0.19969	4.77608	0.217486	0.004846	4.71215	0.208602	4.36526	0.144943	0.014686
PS	34		31.3242	0.514222	30.1576	0.762508	0.021513	29.3333	0.568436	28.3442	0.857456	0.089217	27.5856	0.468853	26.4479	0.494433	0.004846
PS	36		51.2215	1.36493	51.7825	1.18529	0.806768	52.3279	0.902789	53.4721	0.987069	0.144037	54.387	1.25506	55.6475	1.62097	0.3721
PS	38		10.1117	0.925884	11.5537	0.926029	0.045832	10.6041	0.82508	10.9286	1.26618	0.887534	11.7726	1.07833	11.9852	0.789098	0.91807
PS		0	0.65805	0.121805	0.552128	0.13245	0.399718	0.443647	0.0613401	0.49748	0.103368	0.606517	0.650288	0.114871	0.566814	0.0864021	0.404208
PS		1	8.43938	0.552951	8.38984	1.02123	0.995621	8.69193	0.392921	9.56708	0.848458	0.098434	10.0822	0.87306	10.0362	0.614374	0.995621
PS		2	22.009	3.5725	19.5972	4.29758	0.630183	22.2716	3.94411	22.6362	5.24807	0.995621	26.0089	5.85787	24.3628	4.56938	0.879014
PS		3	38.756	2.07858	39.298	2.73799	0.91807	40.4879	2.51113	40.1225	3.41669	0.970935	37.4709	3.68204	38.7525	2.95255	0.849749
PS		4	28.1274	1.9623	29.856	2.35714	0.418399	25.8395	1.88918	24.9438	2.27165	0.807984	22.6931	2.72602	22.9776	2.24981	0.970935
PS		5	1.89838	0.239827	2.18957	0.31784	0.241093	2.16735	0.277381	2.13503	0.343618	0.974666	2.98616	0.320244	3.18463	0.258213	0.538138
PS		6	0.111843	0.0517856	0.117251	0.0419065	0.970935	0.0981321	0.0278321	0.0979666	0.0522778	0.998113	0.108458	0.0268826	0.119527	0.0327539	0.849749
PG	26		0	0	0	0		0	0	0	0		0	0	0	0
PG	28		0.335101	0.208732	0.295674	0.144031	0.91807	0.206025	0.182113	0.172312	0.186243	0.934805	0.0938548	0.111229	0.139758	0.150621	0.854308
PG	30		3.91997	0.222759	3.38734	0.225743	0.004846	5.01498	0.254063	4.59265	0.202431	0.019817	10.8843	1.2129	11.4076	1.76974	0.854308
PG	32		39.9566	0.824535	36.5296	1.36912	0.000899	40.0147	0.507356	38.616	1.95564	0.285211	35.5426	1.69383	33.539	1.72782	0.16377
PG	34		47.2208	0.915895	49.9669	1.1439	0.00261	45.9561	0.729348	47.655	1.4899	0.065384	43.6075	0.699848	45.0434	1.17703	0.058696
PG	36		8.56749	0.373811	9.82052	0.83289	0.014686	8.80818	0.523663	8.96413	0.764389	0.91807	9.87181	1.02002	9.87019	1.06092	0.998113
PG	38		0	0	0	0		0	0	0	0		0	0	0	0
PG		0	0.259085	0.185572	0.116122	0.125551	0.341602	1.02908	0.14396	1.08444	0.0983691	0.797673	7.85215	1.22839	8.41374	1.69987	0.849749
PG		1	61.3684	0.906061	61.4258	0.893345	0.995621	59.0328	1.12655	59.0387	1.63424	0.998113	49.2569	1.32144	48.2631	1.73992	0.594731
PG		2	34.3228	1.49557	35.1905	1.76787	0.736625	35.6187	1.09171	35.0934	1.66645	0.849749	34.9937	1.07134	35.3863	0.910469	0.834918
PG		3	3.56091	0.911453	2.78386	1.50943	0.618974	3.70586	2.00587	4.1779	1.23223	0.893613	7.32064	1.18942	7.36353	1.78495	0.998113
PG		4	0.477522	0.153218	0.483701	0.126214	0.998113	0.613545	0.0904664	0.605525	0.164993	0.995621	0.576578	0.622342	0.573319	0.632205	0.998113
PG		5	0.0112642	0.0318599	0	0	0.757501	0	0	0	0		0	0	0	0
PG		6	0	0	0	0		0	0	0	0		0	0	0	0
Cer	26		0	0	0	0		0	0	0	0		0	0	0	0
Cer	28		0	0	0	0		0	0	0	0		0	0	0	0
Cer	30		0	0	0	0		0	0	0	0		0	0	0	0
Cer	32		5.41306	1.1238	5.83696	1.23918	0.849749	3.55351	0.177035	3.55909	0.385391	0.998113	1.85202	0.136789	1.89274	0.177733	0.899744
Cer	34		71.8089	8.38046	74.4266	7.8724	0.872776	74.5671	0.906672	75.3507	1.629	0.647561	58.1543	1.22914	60.6063	0.895667	0.005786
Cer	36		22.5714	9.47689	19.5437	9.12379	0.872776	21.7675	1.05742	20.9884	1.9858	0.772377	39.8743	1.09244	37.3927	0.930882	0.004532
Cer	38		0.206665	0.0430484	0.192736	0.0453984	0.879014	0.111853	0.00912579	0.101793	0.00873459	0.180249	0.119376	0.0214778	0.108315	0.0149288	0.647141
Cer		0	2.18099	1.33934	2.56179	0.698607	0.849749	0.487944	0.498802	0.834245	0.673433	0.660368	0.330809	0.366269	0.272264	0.30726	0.934805
Cer		1	95.2439	0.932018	95.3653	1.49741	0.974666	95.48	0.758137	95.2633	1.48392	0.934805	71.999	2.57467	72.4651	1.51666	0.91807
Cer		2	2.57514	0.980296	2.07291	1.09858	0.776271	4.03206	0.801292	3.90247	1.0598	0.970935	27.6701	2.58349	27.2627	1.74118	0.934805
Cer		3	0	0	0	0		0	0	0	0		0	0	0	0
Cer		4	0	0	0	0		0	0	0	0		0	0	0	0
Cer		5	0	0	0	0		0	0	0	0		0	0	0	0
Cer		6	0	0	0	0		0	0	0	0		0	0	0	0
CerPE	26		0	0	0	0		0	0	0	0		0	0	0	0
CerPE	28		0	0	0	0		0	0	0	0		0	0	0	0
CerPE	30		0	0	0	0		0	0	0	0		0	0	0	0
CerPE	32		8.81837	0.426346	8.36835	0.41789	0.218015	4.73812	0.203625	4.27531	0.274132	0.015041	2.86479	0.172571	2.7476	0.0881745	0.380009
CerPE	34		67.7886	1.55544	68.6383	1.36694	0.661685	72.725	0.63479	73.5749	1.599	0.516711	60.0811	0.823852	60.1342	0.676907	0.995621
CerPE	36		23.393	1.8948	22.9933	1.60655	0.91807	22.5369	0.695064	22.1498	1.83726	0.893613	37.0541	0.856047	37.1182	0.680636	0.995621
CerPE	38		0	0	0	0		0	0	0	0		0	0	0	0
CerPE		0	1.86032	0.126087	1.96844	0.214104	0.627255	0.649149	0.25062	0.384334	0.202563	0.166204	0.0952009	0.00748844	0.0701736	0.0143922	0.007289
CerPE		1	95.2029	1.03029	95.4852	1.04193	0.895082	96.0667	0.696732	96.4354	0.963536	0.806768	78.0068	0.739482	76.5075	0.583973	0.005865
CerPE		2	2.85252	1.00915	2.43873	0.712504	0.776271	3.28418	0.803002	3.18026	0.917534	0.970935	21.898	0.73612	23.4223	0.58492	0.005786
CerPE		3	0	0	0	0		0	0	0	0		0	0	0	0
CerPE		4	0.0842384	0.129604	0.107649	0.304478	0.974666	0	0	0	0		0	0	0	0
CerPE		5	0	0	0	0		0	0	0	0		0	0	0	0
CerPE		6	0	0	0	0		0	0	0	0		0	0	0	0
PE O-	26		0	0	0	0		0	0	0	0		0	0	0	0
PE O-	28		0	0	0	0		0	0	0	0		0	0	0	0
PE O-	30		0	0	0	0		0	0	0	0		0	0	0	0
PE O-	32		2.4631	0.375133	2.34405	0.311564	0.854308	2.30733	0.205673	2.03474	0.170146	0.065384	1.81769	0.159538	1.69957	0.16439	0.490404
PE O-	34		41.8584	2.62712	41.1028	1.30733	0.849749	35.7747	1.64716	35.7382	0.969692	0.998113	31.7509	1.82706	32.7162	2.24385	0.776271
PE O-	36		55.5785	2.87727	56.3838	1.40444	0.849749	61.918	1.75982	62.1774	0.946794	0.934805	64.3603	2.03518	63.4213	2.46451	0.829813
PE O-	38		0.099925	0.28263	0.16933	0.31538	0.91807	0	0	0.0496509	0.140434	0.757501	2.07111	0.371188	2.16299	0.208833	0.887534
PE O-		0	0	0	0	0		0	0	0	0		0	0	0	0
PE O-		1	69.7485	3.1823	71.02	2.01966	0.776271	66.6021	5.56675	69.2374	1.45443	0.593066	54.9233	4.9441	56.1719	4.60942	0.896106
PE O-		2	29.2189	1.84504	28.8106	1.94527	0.91807	30.7432	3.11024	30.7129	1.45718	0.998113	30.415	3.49475	29.7436	2.7648	0.91807
PE O-		3	0.932632	2.63788	0.0767047	0.216954	0.786741	2.65471	4.01606	0.0496509	0.140434	0.330522	13.8115	1.88859	13.2357	2.18119	0.893613
PE O-		4	0.099925	0.28263	0.092625	0.261983	0.998113	0	0	0	0		0	0	0	0
PE O-		5	0	0	0	0		0	0	0	0		0.850253	0.619635	0.848794	0.362094	0.998113
PE O-		6	0	0	0	0		0	0	0	0		0	0	0	0

## Sheet: all lipid species
	pmol lipid/embryo
Genotype:	Control	Control	Hsl1	Hsl1	Control vs. Hsl1	Control	Control	Hsl1	Hsl1	Control vs. Hsl1	Control	Control	Hsl1	Hsl1	Control vs. Hsl1
time AEL:	0-2h	0-2h	0-2h	0-2h	0-2h	6-8h	6-8h	6-8h	6-8h	6-8h	18-20h	18-20h	18-20h	18-20h	18-20h
Lipid species	Mean	SD	Mean	SD	q value	Mean	SD	Mean	SD	q value	Mean	SD	Mean	SD	q value
Cer 32:1:2	0.0660744	0.00736004	0.0752954	0.00614192	0.222942	0.0826285	0.00410755	0.0900453	0.00513112	0.123852	0.0410386	0.00685937	0.0459491	0.00401048	0.556924
Cer 32:0:2	0.00399294	0.002858	0.00572236	0.00188648	0.6094	0.00208922	0.00179825	0.00275015	0.00207115	0.861878	0.00117676	0.00142152	0.000909164	0.000979838	0.929141
Cer 34:2:2	0.0147838	0.00597366	0.0133447	0.00922369	0.93502	0.0446196	0.00757606	0.0482101	0.0133491	0.872778	0.253074	0.0423369	0.28556	0.0301587	0.548413
Cer 34:1:2	0.902899	0.121744	1.00804	0.129471	0.559543	1.72532	0.120622	1.90898	0.125532	0.169716	1.068	0.183658	1.21874	0.176189	0.559543
Cer 34:0:2	0.0245226	0.0124551	0.0311049	0.0117927	0.738414	0.0103261	0.0111761	0.019316	0.0144693	0.62284	0.00720796	0.00793608	0.00686824	0.00782368	0.985369
Cer 36:2:2	0.0111915	0.00495698	0.0105935	0.00811519	0.980652	0.0351044	0.00882967	0.0373726	0.0145227	0.933616	0.265866	0.0456432	0.26653	0.0304612	0.990797
Cer 36:1:2	0.303193	0.156113	0.28631	0.150941	0.972342	0.477569	0.0636894	0.508018	0.0828385	0.807707	0.574141	0.090069	0.59131	0.10011	0.937098
Cer 36:2:3	0.00463201	0.00301209	0.00319348	0.00358661	0.787363	0.00896065	0.00216778	0.00903558	0.00348531	0.987574	0.0687739	0.0130412	0.0751525	0.00692233	0.677655
Cer 38:2:2	0.00401366	0.00131427	0.00436825	0.00226848	0.933616	0.00744754	0.00154375	0.00905067	0.00230185	0.576668	0.0568198	0.0105464	0.0665243	0.0086494	0.477088
CerPE 32:2:1	0.00180646	0.00223475	0.000932798	0.00176484	0.787363	0.00258284	0.00291573	0.00144456	0.00210908	0.770866	0.0342601	0.00867558	0.0427438	0.0049191	0.334282
CerPE 32:1:1	0.32346	0.0165041	0.327461	0.0417588	0.963181	0.283422	0.0230874	0.253132	0.0196915	0.204871	0.201604	0.0328098	0.193341	0.0255906	0.901456
CerPE 32:0:1	0.0229359	0.00107226	0.0254504	0.00486884	0.6094	0.0140347	0.00241807	0.0112421	0.00155763	0.216038	0.00809576	0.00127444	0.00625911	0.0018652	0.389583
CerPE 32:4:2	0.00334747	0.00521758	0.00536454	0.0151732	0.937098	0	0	0	0		0	0	0	0
CerPE 32:2:2	0	0	0	0		0	0	0	0		0.000177258	0.00031861	0.000139048	0.000257474	0.963181
CerPE 34:2:1	0.0611052	0.0233064	0.0583358	0.0195442	0.963181	0.114475	0.0255094	0.113511	0.0387087	0.987112	0.949002	0.164187	1.06251	0.112815	0.576668
CerPE 34:1:1	2.59406	0.168494	2.82443	0.36556	0.576668	4.4715	0.43435	4.46225	0.424234	0.989569	4.14342	0.723068	4.18975	0.472845	0.98251
CerPE 34:0:1	0.0512859	0.00527547	0.0596514	0.0128458	0.559543	0.0276657	0.0170381	0.0133375	0.0139304	0.533683	0	0	0	0
CerPE 35:2:1	0.00145931	0.00155118	0.00142968	0.00166292	0.990797	0.00107717	0.00115767	0.00161637	0.00146683	0.807707	0.00139206	0.00207348	0.00385694	0.00421387	0.601356
CerPE 34:2:2	0.000880682	0.00134716	0.00226826	0.00250457	0.626096	0.00218477	0.0025407	0.00299693	0.00325894	0.901456	0.0427547	0.00888346	0.0501735	0.00782559	0.548413
CerPE 35:1:1	0.00864427	0.00197989	0.0102905	0.00214952	0.578423	0.0144144	0.00296344	0.0161858	0.00374559	0.738414	0.0200453	0.00393003	0.021923	0.00275077	0.738414
CerPE 36:2:1	0.0523949	0.0237054	0.0458466	0.0204805	0.891236	0.0873273	0.0209332	0.0858212	0.0389501	0.985369	0.847253	0.166425	0.909955	0.120997	0.787363
CerPE 36:1:1	0.8881	0.133929	0.949362	0.182046	0.825044	1.34657	0.174885	1.31022	0.237368	0.937098	2.32359	0.411541	2.37078	0.333983	0.963181
DG 26:0:0	0.271481	0.0904864	0.265236	0.0693318	0.98251	0.164945	0.0297343	0.167312	0.0304078	0.98251	0.259982	0.0701933	0.202908	0.0564644	0.539155
DG 28:2:0	0.0317625	0.005576	0.0334547	0.00465459	0.873589	0.0377971	0.00511043	0.0351165	0.00424828	0.718517	0.0762204	0.0266745	0.0760962	0.0276814	0.997075
DG 28:1:0	0.301914	0.0428592	0.356399	0.0354632	0.213948	0.299588	0.0325837	0.296373	0.0353412	0.979779	0.606868	0.157852	0.500653	0.0835348	0.559543
DG 28:0:0	0.247317	0.0340067	0.245062	0.0285193	0.984457	0.157634	0.0214739	0.15969	0.0202953	0.979108	0.230153	0.0548703	0.205971	0.0334862	0.738414
DG 30:2:0	0.151281	0.0141566	0.178624	0.0145154	0.050129	0.175612	0.0139348	0.178783	0.013578	0.929141	0.316677	0.0844858	0.275274	0.05546	0.707897
DG 30:1:0	0.515401	0.0653818	0.64378	0.0684432	0.049976	0.443391	0.0447861	0.503105	0.0411566	0.213948	0.80422	0.150279	0.712249	0.0588106	0.576668
DG 30:0:0	0.0775749	0.0397471	0.0898633	0.0626318	0.929141	0.031527	0.0298498	0.0368629	0.031507	0.937098	0.029748	0.0259557	0.0572731	0.0268904	0.446052
DG 32:2:0	0.459992	0.15854	0.634197	0.18163	0.462679	0.602114	0.117769	0.602817	0.115511	0.997075	0.79051	0.0872756	0.641582	0.144945	0.310087
DG 32:1:0	0.804569	0.117346	0.895614	0.150092	0.634055	0.580337	0.0564264	0.704133	0.0796545	0.070994	0.759013	0.147797	0.67404	0.0473833	0.594084
DG 32:0:0	0.0787679	0.0492817	0.0896503	0.0918642	0.958686	0.0331984	0.0359116	0.0216671	0.0457166	0.901456	0.00668752	0.0189152	0.0139207	0.0393737	0.929141
DG 34:4:0	0.0216356	0.012302	0.0227703	0.0166411	0.98251	0.0206992	0.00783993	0.0202631	0.00711832	0.985369	0.0349104	0.0140447	0.0303642	0.00829538	0.813375
DG 34:3:0	0.126955	0.03433	0.15269	0.0448512	0.653741	0.127977	0.0280848	0.121972	0.0269347	0.929141	0.227061	0.0692397	0.19805	0.0398313	0.738414
DG 34:2:0	0.694999	0.077168	0.835158	0.136611	0.293421	0.659134	0.0478327	0.701271	0.0574062	0.578423	0.917557	0.180374	0.75385	0.065812	0.334282
DG 34:1:0	0.579651	0.0786942	0.686592	0.111414	0.408808	0.376297	0.0368072	0.432804	0.0308748	0.105487	0.518278	0.0966976	0.458999	0.0406185	0.578423
DG 36:4:0	0	0	0.0313435	0.0609218	0.6094	0	0	0.00252144	0.00713172	0.738414	0.00358786	0.010148	0.0162357	0.021207	0.600111
DG 36:3:0	0.0571431	0.0182405	0.0913666	0.0827786	0.718517	0.054276	0.0151314	0.0519086	0.00927794	0.933616	0.133552	0.0353235	0.128607	0.0402929	0.963181
DG 36:2:0	0.185143	0.0439177	0.235276	0.0938561	0.631136	0.180096	0.0217426	0.173366	0.019325	0.874804	0.282839	0.0609931	0.248657	0.0436991	0.653741
DG 36:1:0	0.0647361	0.0230486	0.100154	0.0414431	0.444258	0.0464342	0.0130464	0.0509674	0.0126144	0.854324	0.0674479	0.0223489	0.0629557	0.0135246	0.929141
LPA 16:1:0	0.0102042	0.01729	0	0	0.559819	0	0	0	0		0	0	0.00577759	0.0163415	0.738414
LPA 16:0:0	0	0	0	0		0	0	0	0		0	0	0	0
LPA 18:3:0	0	0	0	0		0	0	0	0		0	0	0	0
LPA 18:2:0	0	0	0	0		0	0	0	0		0	0	0	0
LPA 18:1:0	0.0121307	0.0240424	0	0	0.6094	0	0	0	0		0.00356301	0.0100777	0.0125504	0.0303961	0.811777
LPA 18:0:0	0.00246442	0.00697042	0.00272958	0.00772041	0.985369	0	0	0	0		0	0	0	0
LPC 16:1:0	0.321514	0.105389	0.197758	0.0632994	0.203413	0.358844	0.107775	0.337361	0.144081	0.942229	0.339537	0.104759	0.266432	0.110107	0.631331
LPC 16:0:0	0.0780744	0.0176174	0.0657726	0.0150608	0.600111	0.117827	0.0320651	0.116884	0.0444162	0.98856	0.145822	0.039658	0.120425	0.0327398	0.62244
LPC 18:3:0	0.00392438	0.00689084	0.00208225	0.00315084	0.858144	0.00169676	0.00316375	0.00180985	0.0034265	0.985369	0.00258753	0.00264416	0.00255168	0.00296346	0.994778
LPC 18:2:0	0.0250515	0.00879972	0.0251978	0.00843196	0.990797	0.0273753	0.0126581	0.0280089	0.0118601	0.985369	0.0355373	0.00973154	0.0363392	0.00765777	0.980065
LPC 18:1:0	0.146941	0.0428286	0.108285	0.0225008	0.391609	0.164976	0.0427325	0.161604	0.070516	0.985369	0.179385	0.059471	0.165489	0.054291	0.929141
LPC 18:0:0	0.0052561	0.00647715	0.0074649	0.00876898	0.896863	0.00304092	0.0033458	0.00387312	0.00430562	0.929141	0.0044692	0.00488533	0.00655835	0.0055994	0.811777
LPE 14:0:0	0.0946108	0.0192119	0.0659498	0.011355	0.06703	0.17422	0.0468208	0.161654	0.0841876	0.93502	0.176881	0.0481096	0.128775	0.0531714	0.514577
LPE 16:1:0	0.547904	0.157415	0.357305	0.0711518	0.139064	0.74304	0.228809	0.663801	0.356958	0.914222	0.531764	0.15855	0.453957	0.18368	0.770866
LPE 16:0:0	0.667273	0.143747	0.528368	0.0757105	0.334282	1.20182	0.361342	1.2772	0.650643	0.960422	1.43727	0.537897	1.07445	0.410653	0.600111
LPE 18:3:0	0.00620173	0.00674794	0.00716294	0.00771784	0.963181	0.0064125	0.00704816	0.00554392	0.00708773	0.964524	0.00853005	0.00919382	0.00950244	0.0106867	0.979108
LPE 18:2:0	0.0827449	0.0259467	0.0637431	0.0180586	0.559543	0.114288	0.0485127	0.10986	0.0558789	0.98251	0.114002	0.0303717	0.107699	0.023296	0.929141
LPE 18:1:0	0.882173	0.188533	0.635054	0.104528	0.115536	1.31225	0.354745	1.1721	0.521414	0.877773	1.12282	0.315552	0.936348	0.333655	0.716179
LPE 18:0:0	0.0794767	0.0123181	0.0748899	0.0115515	0.825044	0.146521	0.0263624	0.154108	0.0486214	0.933426	0.200348	0.0448421	0.178974	0.0458076	0.759552
LPI 16:1:0	0.173328	0.0726563	0.10429	0.0352063	0.334282	0.185952	0.073911	0.156646	0.0678876	0.811777	0.195274	0.0724228	0.205389	0.110736	0.972915
LPI 16:0:0	0.169235	0.0603945	0.132834	0.028448	0.594084	0.214783	0.0677885	0.171924	0.0540703	0.639741	0.198645	0.0628531	0.199245	0.0752067	0.997075
LPI 18:3:0	0	0	0	0		0.00227494	0.00643451	0	0	0.76242	0.0145014	0.0171161	0.0216349	0.0228937	0.854324
LPI 18:2:0	0.124028	0.0522523	0.0770152	0.0310724	0.42723	0.158197	0.0316647	0.144701	0.0484327	0.874804	0.258835	0.0706072	0.262611	0.105355	0.985369
LPI 18:1:0	0.309146	0.113102	0.244692	0.0375908	0.600086	0.386389	0.0918688	0.333939	0.0884629	0.732488	0.458151	0.11006	0.486198	0.142072	0.929141
LPI 18:0:0	0.085538	0.0940507	0.0823656	0.0892144	0.985369	0.124968	0.118987	0.107389	0.101694	0.956439	0.165458	0.1222	0.152009	0.131674	0.975025
LPS 16:1:0	0.0234503	0.0133556	0.0133688	0.00610679	0.4927	0.0310861	0.0146969	0.0232881	0.0141144	0.738414	0.0331689	0.0163913	0.0341426	0.0283882	0.985369
LPS 16:0:0	0.0140129	0.0074374	0.00848237	0.00424024	0.535863	0.0149826	0.00947023	0.0149729	0.00874642	0.999262	0.0184422	0.00874404	0.0210031	0.0132983	0.929141
LPS 18:3:0	0.0544006	0.0355106	0.0337907	0.0273322	0.653741	0.147307	0.0350157	0.100136	0.0645696	0.536937	0.095608	0.0561651	0.0816132	0.0796208	0.929782
LPS 18:2:0	0.0649932	0.0612885	0.0477015	0.0544016	0.890449	0.135755	0.135559	0.110048	0.106337	0.929141	0.184149	0.0884727	0.158269	0.112692	0.919219
LPS 18:1:0	0.13545	0.082062	0.0966538	0.0378562	0.680102	0.2014	0.0790043	0.179355	0.0906193	0.915075	0.219422	0.106044	0.245238	0.140243	0.929782
LPS 18:0:0	0.0184476	0.00987922	0.0170093	0.0125317	0.963181	0.0327962	0.0139348	0.0296296	0.0167496	0.929782	0.0391438	0.0174848	0.0440127	0.0230534	0.929141
PA 26:2:0	0.0546103	0.0127588	0.044626	0.017551	0.653741	0.0572009	0.0120626	0.0487686	0.0131838	0.639741	0.0658867	0.0087541	0.0525961	0.0162119	0.462679
PA 26:1:0	0.0230598	0.0113156	0.0253873	0.0160404	0.942229	0.0081597	0.00921185	0.0077886	0.00917682	0.985369	0.0115655	0.0125471	0.00396016	0.00580591	0.594084
PA 32:2:0	0.022392	0.00862774	0.0152085	0.00738793	0.539155	0.0173641	0.00873436	0.0130393	0.00956427	0.759552	0.0248399	0.00833043	0.0195758	0.0122815	0.738414
PA 32:1:0	0.0289515	0.0310147	0.020822	0.0237853	0.891236	0.0140972	0.0151052	0.00508068	0.0077494	0.600111	0.0176177	0.0201254	0.00909577	0.0106153	0.738414
PA 32:0:0	0.0247969	0.022229	0.0162085	0.0148252	0.770866	0.00918809	0.00985327	0.00576058	0.00619806	0.807707	0.00492556	0.00540962	0.00280959	0.0030613	0.75306
PA 34:2:0	0.0275906	0.0305209	0.0165118	0.0195557	0.787363	0.0183481	0.0206734	0.0440747	0.0661086	0.738414	0.0260593	0.0280561	0.0243205	0.0264339	0.985369
PA 34:1:0	0.0249802	0.0268297	0.021428	0.0241349	0.963181	0.0119625	0.0129153	0.00698634	0.00827146	0.769432	0.0178462	0.0203529	0.0100032	0.010812	0.75306
PC 26:0:0	0.314351	0.0324367	0.289795	0.0312138	0.594084	0.426156	0.0325165	0.353121	0.017281	0.0034	0.551444	0.0962774	0.396906	0.0294566	0.026376
PC 28:1:0	0.325597	0.0350716	0.31789	0.0339733	0.929141	0.403826	0.0434658	0.376468	0.0236846	0.594084	0.616555	0.0916681	0.51968	0.0437743	0.22521
PC 28:0:0	0.134209	0.0288067	0.132807	0.0418088	0.985369	0.308029	0.0365192	0.254202	0.0232801	0.079289	0.353266	0.0711496	0.29137	0.0653341	0.536937
PC 30:1:0	3.85276	0.26009	3.34372	0.413049	0.173525	4.51594	0.612999	3.47165	0.321704	0.027578	5.08012	0.952385	4.23533	0.604097	0.444258
PC 32:4:0	0.014741	0.0178842	0.0320868	0.0224762	0.559543	0.0640769	0.0175168	0.0607292	0.0137337	0.929141	0.054312	0.027465	0.0741202	0.0207056	0.576668
PC 32:3:0	0.125144	0.0104629	0.140709	0.028034	0.601356	0.125602	0.0107353	0.119247	0.009263	0.662469	0.16472	0.0321978	0.152737	0.0225498	0.787363
PC 32:2:0	22.5065	1.65313	21.3458	2.90568	0.747113	23.6787	3.71996	20.6776	2.37291	0.504226	22.5821	4.09714	20.2597	2.21063	0.618378
PC 32:1:0	9.57998	0.936737	9.26257	1.15264	0.890433	12.3347	1.71677	11.8527	1.23494	0.874804	12.9133	2.18004	11.8712	1.12636	0.682012
PC 34:4:0	0.375278	0.0596047	0.367618	0.0398049	0.956955	0.450159	0.0487237	0.433067	0.0218209	0.770866	0.590495	0.0947183	0.564513	0.043437	0.854324
PC 34:3:0	2.96979	0.400575	2.88769	0.311965	0.929141	4.18833	0.484157	4.03493	0.245127	0.811777	6.38437	1.0225	6.13536	0.578794	0.890449
PC 34:2:0	17.7735	1.93212	18.1066	2.26346	0.949293	19.6602	2.38262	19.1424	2.45931	0.929141	21.408	3.22697	20.6188	1.81784	0.890433
PC 34:1:0	5.20233	0.682203	5.6912	0.737963	0.626456	4.95156	0.611874	5.45579	0.685725	0.594084	4.75812	0.602866	4.82663	0.540304	0.965529
PC 36:5:0	0.0131124	0.0140348	0.0136121	0.0118982	0.985369	0.0248014	0.0243402	0.0255434	0.0155838	0.985369	0.072992	0.0282445	0.0760491	0.0380062	0.980065
PC 36:4:0	0.363997	0.0772676	0.350764	0.0527558	0.929782	0.522887	0.11612	0.526256	0.0468934	0.985369	0.980684	0.200054	1.02832	0.228095	0.929141
PC 36:3:0	1.52656	0.23976	1.5275	0.16977	0.997075	2.07065	0.320213	2.12173	0.166656	0.929782	3.6024	0.627611	3.57743	0.373442	0.985369
PC 36:2:0	2.87474	0.393899	3.31862	0.498688	0.488845	2.76864	0.388017	3.03517	0.457781	0.66318	3.29627	0.529815	3.28651	0.425495	0.989569
PE 26:1:0	0.0809477	0.0136693	0.0940951	0.0145988	0.523073	0.135048	0.00583422	0.130064	0.00723158	0.600111	0.0837956	0.011431	0.0772105	0.00759541	0.631331
PE 26:0:0	0.982586	0.0554786	0.963158	0.116247	0.929141	1.71059	0.121354	1.83359	0.0952853	0.391609	0.999672	0.188885	0.970574	0.202523	0.958501
PE 28:2:0	0.0110628	0.00135318	0.0128747	0.00181708	0.391609	0.0190716	0.00110688	0.0189637	0.000669944	0.965529	0.0192763	0.00299557	0.0186067	0.00221087	0.919626
PE 28:1:0	0.588392	0.0478757	0.551993	0.0572836	0.626096	0.933456	0.0830999	0.889034	0.0543889	0.662469	0.754443	0.118624	0.720393	0.116638	0.89475
PE 28:0:0	0.419958	0.0164558	0.417686	0.0521047	0.985369	0.742754	0.0420055	0.845028	0.0507188	0.025221	0.537663	0.085336	0.586195	0.127832	0.770866
PE 30:2:0	0.173967	0.0179628	0.166075	0.0193772	0.800541	0.242508	0.0193934	0.225048	0.0147774	0.470552	0.239184	0.041987	0.23801	0.0249755	0.985369
PE 30:1:0	3.23569	0.422294	2.95185	0.455579	0.653741	3.92885	0.521565	3.27152	0.366931	0.181645	3.68059	0.76799	3.36215	0.642662	0.770866
PE 30:0:0	0.169498	0.019347	0.167493	0.0365343	0.985369	0.350944	0.0246504	0.431913	0.0417957	0.015205	0.25434	0.0403861	0.298365	0.0718145	0.600111
PE 32:3:0	0.0952625	0.0170562	0.0950933	0.0285165	0.997075	0.1134	0.0250447	0.110399	0.0213505	0.963181	0.147126	0.0286158	0.156357	0.0226798	0.854324
PE 32:2:0	9.12452	1.19365	9.15845	1.2461	0.987112	9.43607	1.14591	8.49173	0.834115	0.517533	8.86783	1.63466	8.58	1.33461	0.933616
PE 32:1:0	26.54	2.85901	25.9236	3.43592	0.933149	29.0851	3.37843	26.5877	2.63645	0.572876	25.7714	4.87155	25.1744	3.81408	0.963181
PE 34:4:0	0.232012	0.0272475	0.247855	0.0407707	0.770866	0.219079	0.0219517	0.225693	0.0137689	0.853068	0.314777	0.0557133	0.291744	0.0312712	0.738414
PE 34:3:0	2.30677	0.257627	2.31987	0.348917	0.985369	2.65475	0.315194	2.66932	0.152828	0.985369	3.91338	0.671871	3.8242	0.265806	0.937098
PE 34:2:0	22.7053	2.18039	23.1045	3.09346	0.958501	23.716	2.11407	22.788	2.28471	0.800541	25.1897	4.16459	24.4807	2.70052	0.929782
PE 34:1:0	26.3444	2.99167	26.0568	3.85484	0.98251	35.5927	4.19734	36.7639	5.22271	0.929141	41.8752	7.19047	42.3018	5.18129	0.985369
PE 36:5:0	0.0128085	0.0102115	0.0152532	0.0106211	0.929141	0.0198588	0.0139246	0.0150961	0.0135033	0.854324	0.0571805	0.0153623	0.0620147	0.0211922	0.915075
PE 36:4:0	0.401755	0.0533831	0.413566	0.0647275	0.929782	0.540044	0.0732884	0.52118	0.0218633	0.854324	0.906747	0.166156	0.956156	0.148684	0.877773
PE 36:3:0	1.79942	0.243534	1.86995	0.245404	0.89475	2.5048	0.285788	2.40436	0.176562	0.800541	3.88461	0.650144	3.99422	0.322784	0.929141
PE 36:2:0	12.9711	1.83124	14.2919	2.21618	0.653741	16.0228	2.37382	15.228	2.34351	0.862103	16.5177	3.09567	16.3472	2.46672	0.985369
PE 36:1:0	2.37692	0.48142	3.44167	0.648105	0.057138	3.65578	0.617247	4.40623	0.7541	0.427287	5.17078	0.991312	5.62837	0.874927	0.747113
PE 38:4:0	0.000833344	0.00235705	0	0	0.738414	0	0	0.0009991	0.00282588	0.738414	0.0057725	0.00805696	0.000716416	0.00202633	0.558625
PE 38:3:0	0.0265222	0.00537108	0.0272299	0.00523814	0.963181	0.0377817	0.00414352	0.0353368	0.00603138	0.759552	0.0709491	0.0112061	0.0660739	0.00373126	0.706384
PE 38:2:0	0.0302782	0.015584	0.0342704	0.0087998	0.877319	0.0444589	0.0102117	0.049797	0.0135012	0.770866	0.0909479	0.019652	0.102584	0.00659277	0.579327
PE O- 32:1:0	0.0121965	0.00147434	0.0105447	0.00182943	0.48844	0.0134184	0.00107464	0.010815	0.0018929	0.097113	0.0413384	0.00803597	0.0396078	0.00679386	0.929141
PE O- 34:2:0	0.0417867	0.0039361	0.0371051	0.00713671	0.576668	0.0386398	0.0028184	0.0338614	0.00559587	0.435685	0.0488682	0.00908011	0.0470416	0.00784223	0.929141
PE O- 34:1:0	0.167507	0.0280381	0.150137	0.0302892	0.690211	0.170275	0.0187813	0.157574	0.0341941	0.768325	0.676892	0.144807	0.714601	0.109358	0.891236
PE O- 36:4:0	0	0	0	0		0	0	0	0		0	0	0	0
PE O- 36:3:0	0.00551599	0.0156016	0	0	0.738414	0.0160651	0.0240737	0	0	0.517533	0.283082	0.0422967	0.273408	0.0311698	0.915075
PE O- 36:2:0	0.104076	0.0180444	0.0940825	0.0212581	0.738414	0.141518	0.0278271	0.130631	0.0288366	0.825044	0.637226	0.109452	0.639109	0.0508969	0.989569
PE O- 36:1:0	0.169363	0.023001	0.163941	0.0373534	0.937098	0.204637	0.0272645	0.202032	0.0368544	0.98251	0.540574	0.142493	0.555102	0.107274	0.966021
PE O- 38:5:0	0	0	0	0		0	0	0	0		0.0193379	0.0149344	0.0200001	0.00920758	0.985369
PE O- 38:4:0	0.000526301	0.0014886	0.000520991	0.00147359	0.997075	0	0	0	0		0	0	0	0
PE O- 38:3:0	0	0	0.000325236	0.000919907	0.738414	0	0	0.000213395	0.000603572	0.738414	0.027345	0.00940662	0.0303196	0.00506253	0.813375
PG 28:1:0	0.0138955	0.0089794	0.0119111	0.00589233	0.915075	0.00770237	0.00679101	0.00576351	0.00621035	0.890449	0.00331545	0.00388898	0.00478893	0.00516383	0.874804
PG 30:1:0	0.151303	0.0223708	0.135662	0.0244304	0.639741	0.160593	0.0283659	0.129807	0.0131321	0.213948	0.116483	0.0236334	0.110028	0.0164245	0.877319
PG 30:0:0	0.0108403	0.00840098	0.00458332	0.00503294	0.537683	0.0412816	0.00787723	0.0403045	0.00640149	0.963181	0.296169	0.0435683	0.308469	0.0643967	0.929141
PG 32:2:0	0.455583	0.0816375	0.433353	0.0786411	0.901456	0.438757	0.0559393	0.392886	0.0669734	0.601356	0.392087	0.0838289	0.357167	0.0494771	0.738414
PG 32:1:0	1.19484	0.151566	1.07816	0.163272	0.601356	1.16511	0.142434	1.03986	0.118089	0.507202	0.973899	0.174963	0.873913	0.105705	0.626096
PG 34:3:0	0.0884281	0.0316521	0.0535273	0.0474125	0.558625	0.0662933	0.0585977	0.0815963	0.0317931	0.874804	0.16481	0.0293597	0.154061	0.030458	0.853068
PG 34:2:0	0.688977	0.104626	0.697004	0.120084	0.984457	0.736869	0.0849034	0.673426	0.0874259	0.601356	0.709269	0.124124	0.712975	0.0541275	0.985369
PG 34:1:0	1.17089	0.14431	1.31379	0.199711	0.576668	1.03574	0.151948	1.01412	0.131054	0.956439	0.794662	0.129287	0.781652	0.0746719	0.964524
PG 36:5:0	0.000438065	0.00123903	0	0	0.738414	0	0	0	0		0	0	0	0
PG 36:4:0	0.0193437	0.00530356	0.0197272	0.00515905	0.984457	0.024391	0.00307009	0.0221573	0.00577954	0.75306	0.0203233	0.0219466	0.0196453	0.0216784	0.987112
PG 36:3:0	0.0578707	0.0115735	0.0566026	0.0146396	0.979779	0.0755788	0.0102272	0.0711702	0.0113479	0.807707	0.113259	0.028118	0.11227	0.0223287	0.985369
PG 36:2:0	0.277309	0.0556273	0.332965	0.0817364	0.578423	0.254442	0.0620645	0.241062	0.0582046	0.929141	0.242804	0.0505984	0.227443	0.0393076	0.862103
PI 26:0:0	0.0264	0.0178846	0.020108	0.0179384	0.854324	0	0	0.0038685	0.0109418	0.738414	0	0	0	0
PI 28:1:0	0.0261335	0.00491113	0.0293099	0.00579768	0.69334	0.0357812	0.0052613	0.0366933	0.00579426	0.942469	0.0427943	0.0102061	0.0449174	0.00712355	0.929141
PI 28:0:0	0.0329636	0.00644842	0.0319599	0.00908322	0.963181	0.0164028	0.0042792	0.0174336	0.0117788	0.965529	0.0195454	0.00664135	0.0156233	0.00606875	0.671797
PI 30:2:0	0.0440014	0.00989133	0.0450328	0.0124066	0.980065	0.0584474	0.0199095	0.0566827	0.0250358	0.98251	0.0636102	0.0208361	0.0747358	0.0199645	0.738414
PI 30:1:0	0.501459	0.0653986	0.458501	0.0545393	0.6094	0.771982	0.127462	0.675807	0.0886164	0.556858	0.653891	0.132666	0.622084	0.105163	0.913209
PI 32:3:0	0.0423707	0.0184943	0.0501076	0.0142505	0.759797	0.10041	0.0097446	0.0965917	0.0162099	0.8971	0.105399	0.0132783	0.0986788	0.0191868	0.807707
PI 32:2:0	2.17381	0.270295	2.03854	0.233569	0.738414	2.72589	0.33767	2.4788	0.330824	0.601356	2.72219	0.519446	2.58938	0.450944	0.901983
PI 32:1:0	2.90136	0.217764	2.786	0.274704	0.762294	3.16101	0.374811	2.92128	0.279261	0.6094	2.59637	0.43677	2.60698	0.295711	0.987112
PI 34:4:0	0.177613	0.0129519	0.171278	0.0159375	0.786937	0.248726	0.0218685	0.229973	0.0245975	0.576668	0.357504	0.0529878	0.330504	0.0282975	0.662469
PI 34:3:0	1.3245	0.13896	1.24851	0.108327	0.677655	1.79161	0.198594	1.7555	0.13218	0.929141	2.35362	0.33519	2.26831	0.17774	0.877319
PI 34:2:0	6.05553	0.541765	5.95326	0.55524	0.934594	7.2416	0.455407	7.00136	0.78501	0.835923	7.52243	1.17482	7.39859	0.919154	0.965529
PI 34:1:0	1.95677	0.167157	2.17223	0.242637	0.448699	1.6559	0.293777	1.64726	0.232173	0.986196	1.71864	0.379433	1.73693	0.271588	0.985369
PI 36:5:0	0	0	0	0		0	0	0	0		0.00268456	0.00759308	0	0	0.738414
PI 36:4:0	0.386531	0.0399525	0.361603	0.030536	0.620075	0.609101	0.0761428	0.596711	0.0645864	0.937098	1.13461	0.197234	1.1675	0.127739	0.929782
PI 36:3:0	1.98822	0.235473	1.95695	0.189553	0.959599	3.04414	0.313613	3.01375	0.353187	0.980065	4.43326	0.722315	4.47906	0.380481	0.98251
PI 36:2:0	1.39415	0.0862297	1.87734	0.173783	0.000392	1.47926	0.131495	1.6351	0.208236	0.539155	1.78879	0.305431	1.84541	0.207502	0.929141
PI 38:5:0	0	0	0	0		0	0	0	0		0	0	0	0
PI 38:4:0	0.00110176	0.00311624	0.000775425	0.00219323	0.964643	0	0	0	0		0	0	0	0
PI 38:3:0	0.00258939	0.00572377	0.00238227	0.00364865	0.985369	0	0	0.00117223	0.00331557	0.738414	0.00567213	0.00642527	0.00807001	0.00583524	0.817793
PI 38:2:0	0.00167317	0.00221161	0.00376436	0.0042499	0.671797	0.0092505	0.00327473	0.00962916	0.00767844	0.985369	0.0387485	0.00636247	0.0414908	0.00523142	0.759552
PI 38:1:0	0.00199515	0.00307031	0.00185105	0.00264058	0.985369	0.00250821	0.00142409	0.000947122	0.000950264	0.274044	0.0116225	0.00475188	0.0159899	0.00263249	0.391609
PS 26:2:0	0.0186772	0.00770956	0.0200355	0.00782479	0.937098	0.0456698	0.0143107	0.0383173	0.0130861	0.738414	0.0166202	0.00786984	0.0134258	0.00780886	0.807707
PS 26:1:0	0.0292715	0.0232626	0.0326422	0.0260175	0.963181	0.0303869	0.0244628	0.0282244	0.0237103	0.980652	0.0274464	0.0216298	0.0257899	0.0205287	0.98251
PS 26:0:0	0	0	0	0		0	0	0	0		0	0	0	0
PS 28:3:0	0.00894343	0.00968446	0.0102098	0.00903229	0.963181	0.0172031	0.0155374	0.0137198	0.0146974	0.929141	0.00911052	0.00977081	0.00975032	0.0104479	0.985369
PS 28:2:0	0.157639	0.0310609	0.164873	0.0374642	0.929141	0.326068	0.0804515	0.317214	0.088493	0.975579	0.173421	0.0658523	0.185932	0.0770804	0.937098
PS 28:1:0	0.00796672	0.00221694	0.00546195	0.00198246	0.342577	0.0112312	0.00298653	0.00871806	0.00133079	0.427287	0.0103248	0.00194213	0.00889317	0.00259472	0.66547
PS 28:0:0	0	0	0	0		0	0	0	0		0.00102285	0.00289305	0	0	0.738414
PS 30:3:0	0.103362	0.0239643	0.0972624	0.0234734	0.917673	0.190166	0.0448557	0.165949	0.0432309	0.738414	0.133771	0.0473423	0.144959	0.0515447	0.929141
PS 30:2:0	0.0660655	0.0413495	0.0702759	0.0429901	0.979108	0.166716	0.0608238	0.166358	0.0704377	0.997075	0.110242	0.0615283	0.134015	0.0722608	0.854324
PS 30:1:0	0.0788289	0.00981538	0.0627786	0.00958975	0.106407	0.119893	0.0119293	0.093516	0.00712882	0.004889	0.136276	0.0275799	0.121177	0.0166685	0.644163
PS 32:3:0	0.68724	0.165969	0.662118	0.181283	0.960422	0.95375	0.278172	0.733549	0.224045	0.556957	0.842149	0.340083	0.77888	0.258878	0.929141
PS 32:2:0	0.228444	0.0161386	0.189098	0.0241236	0.049976	0.323103	0.0296563	0.279083	0.0244441	0.115536	0.33116	0.0558719	0.326592	0.0384624	0.979779
PS 32:1:0	0.47664	0.0296674	0.408383	0.067041	0.250786	0.638057	0.0664756	0.552461	0.0573086	0.214863	0.673032	0.108433	0.648361	0.0685466	0.902285
PS 34:5:0	0.0106503	0.00192003	0.0103224	0.00421569	0.979108	0.0163479	0.00383701	0.0108884	0.00500527	0.330405	0.0180899	0.00515501	0.0201683	0.0053269	0.811777
PS 34:4:0	1.4151	0.30653	1.52263	0.354306	0.874804	1.71998	0.418584	1.47855	0.437	0.724613	1.55224	0.538784	1.57328	0.483642	0.985369
PS 34:3:0	4.30761	0.790269	4.50503	0.959192	0.929141	5.56466	1.23928	4.82545	1.35413	0.718517	4.87418	1.5776	4.87348	1.37157	0.999262
PS 34:2:0	1.3736	0.164264	1.13257	0.280755	0.445469	1.98235	0.28463	1.74311	0.194157	0.488845	2.71982	0.566027	2.5709	0.216077	0.854324
PS 34:1:0	0.71876	0.0673016	0.694776	0.0748856	0.862103	1.23392	0.153841	1.16978	0.164537	0.811777	1.44846	0.254722	1.44932	0.184289	0.997075
PS 34:0:0	0.0893856	0.01019	0.0811659	0.00611548	0.488845	0.0998994	0.0176161	0.0800971	0.0128663	0.275569	0.137641	0.0225768	0.116787	0.0162319	0.444258
PS 36:6:0	0.0296481	0.0167733	0.0316657	0.0138018	0.963181	0.0347155	0.00698154	0.0334014	0.0210392	0.98251	0.0423955	0.0149713	0.0468275	0.0120463	0.874804
PS 36:5:0	0.205302	0.0315738	0.255799	0.0607403	0.446052	0.294813	0.0399561	0.288255	0.0862071	0.979108	0.444736	0.117784	0.504762	0.0657471	0.66318
PS 36:4:0	3.77128	0.684824	4.13554	0.935182	0.771929	4.87918	1.08567	4.33288	1.24543	0.759797	4.60504	1.43879	4.86825	1.21531	0.929782
PS 36:3:0	4.614	0.763936	4.89443	1.01421	0.878008	7.79148	1.67962	7.26293	2.12846	0.901456	8.39404	2.25757	9.19174	1.92795	0.828835
PS 36:2:0	3.58831	0.320502	3.45798	0.586456	0.901456	5.01786	0.480802	4.5892	0.384004	0.488845	6.35856	1.16544	6.1701	0.483838	0.929141
PS 36:1:0	0.662032	0.0770146	0.828345	0.0896578	0.042207	0.89511	0.161914	1.05012	0.203392	0.559543	1.1797	0.20436	1.31939	0.182774	0.6094
PS 36:0:0	0.0474821	0.0270317	0.0316596	0.0287415	0.721025	0.0356366	0.0274539	0.0600084	0.0262473	0.536937	0.0893821	0.053208	0.0774093	0.029743	0.901456
PS 38:5:0	0.264027	0.0861638	0.316463	0.113424	0.738414	0.466565	0.106301	0.424652	0.170232	0.891236	0.712881	0.226975	0.746324	0.158252	0.940994
PS 38:4:0	1.97494	0.434335	2.28101	0.490463	0.645356	2.86098	0.71111	2.55097	0.797451	0.807707	2.83279	0.849647	2.88006	0.746991	0.985369
PS 38:3:0	0.126322	0.0479326	0.269289	0.0813884	0.027578	0.287023	0.0780715	0.437167	0.158581	0.334282	0.553696	0.168986	0.676426	0.191773	0.631331
PS 38:2:0	0.0395589	0.00743838	0.0213027	0.0157203	0.170785	0.0324885	0.0213307	0.0319884	0.0165325	0.987574	0.0992056	0.0244966	0.0941686	0.0255949	0.929782
PS 38:1:0	0.146386	0.0177673	0.154934	0.0201799	0.770866	0.208057	0.023585	0.210507	0.0385883	0.98251	0.40063	0.0555448	0.409212	0.0249202	0.929782
PS 38:0:0	0.0296753	0.0170461	0.0285433	0.012011	0.98251	0.0249111	0.0171727	0.0241107	0.0203356	0.985369	0.0277405	0.027234	0.0302531	0.0215249	0.978211
TG 36:4:0	0.00058449	0.00112157	0	0	0.601356	0.00125385	0.0024922	0.00149059	0.00163103	0.969485	0.00263862	0.00238056	0.00119663	0.00224729	0.666487
TG 36:3:0	0.00345676	0.00432478	0.00557116	0.00671794	0.835923	0.00716851	0.00381352	0.00704165	0.00519579	0.987112	0.00699941	0.00615181	0.0117041	0.00361754	0.523073
TG 36:2:0	0.0312563	0.0174073	0.0400727	0.0177014	0.738414	0.0567063	0.0153818	0.0630387	0.0113931	0.759797	0.0707025	0.0222123	0.0787279	0.0227699	0.854324
TG 36:1:0	0.111033	0.0681775	0.147448	0.0822358	0.75306	0.101193	0.0277867	0.106726	0.0218676	0.929141	0.104927	0.0321073	0.114658	0.0293745	0.877319
TG 36:0:0	0.819538	0.29614	0.89291	0.236809	0.901983	0.740968	0.14571	0.651923	0.154841	0.69334	0.371753	0.0847312	0.313712	0.050881	0.564158
TG 38:2:0	0.0804632	0.0374053	0.107104	0.0415619	0.635341	0.0771712	0.0163568	0.0894686	0.0173596	0.6094	0.0824258	0.0218705	0.0863951	0.0202546	0.933616
TG 38:1:0	1.69049	0.522427	1.94494	0.484373	0.738414	1.53292	0.310207	1.61264	0.357371	0.929141	0.803994	0.189499	0.778638	0.10855	0.942469
TG 38:0:0	7.66388	1.85816	7.3127	1.68975	0.929782	7.26359	1.3781	6.17261	1.15303	0.558625	3.55323	0.79128	2.94403	0.343588	0.485409
TG 40:3:0	0.026985	0.0265411	0.0359895	0.0247875	0.854324	0.0171448	0.01892	0.0350175	0.0119651	0.391609	0.0191434	0.0122949	0.0247087	0.0092445	0.738414
TG 40:2:0	1.09485	0.331821	1.32646	0.348621	0.631331	0.978825	0.200367	1.09745	0.23429	0.738414	0.519523	0.135444	0.547204	0.095976	0.929141
TG 40:1:0	8.13147	1.83845	8.49266	1.96153	0.933616	7.22241	1.23366	6.76291	1.18694	0.828835	3.46293	0.784595	3.25755	0.474403	0.877319
TG 40:0:0	14.4378	2.37267	12.6354	2.08539	0.576668	12.8097	1.98303	9.51779	1.27251	0.042832	5.24167	1.10404	4.24119	0.801485	0.44861
TG 42:4:0	0	0	0	0		0	0	0	0		0	0	0	0
TG 42:3:0	0.253833	0.0723838	0.330552	0.103423	0.558625	0.230744	0.0445039	0.2716	0.0493661	0.557856	0.143023	0.0447426	0.164204	0.0375825	0.738414
TG 42:2:0	5.18948	1.2769	5.75289	1.43058	0.807707	4.47455	0.817914	4.44068	0.798863	0.985369	2.18732	0.512898	2.14222	0.293642	0.972915
TG 42:1:0	20.5703	4.59786	19.9402	4.14028	0.960422	17.3328	2.93011	14.7322	2.38638	0.4927	7.60653	1.49384	6.59531	0.797791	0.559543
TG 42:0:0	7.27643	1.17062	6.047	1.00489	0.391609	6.84655	1.55423	4.53525	0.457949	0.039563	2.54182	0.561592	1.92068	0.485293	0.34757
TG 44:3:0	1.33061	0.367946	1.52581	0.411252	0.738414	1.14046	0.230438	1.21734	0.224847	0.862103	0.595675	0.160445	0.65373	0.121359	0.807707
TG 44:2:0	15.7232	3.9527	15.5402	3.4483	0.985369	13.8632	2.52362	12.7786	1.96795	0.754936	6.60045	1.4869	6.12537	0.790508	0.811777
TG 44:1:0	21.7638	4.8649	20.3844	4.19931	0.890433	20.0517	3.33597	17.0259	2.25426	0.444258	9.889	2.00802	8.69039	1.11072	0.601356
TG 44:0:0	3.35089	0.466606	3.10582	0.52558	0.747113	3.18555	0.554037	2.30892	0.19618	0.028889	1.22939	0.26862	1.05918	0.15654	0.594084
TG 46:5:0	0	0	0	0		0	0	0	0		0	0	0	0
TG 46:4:0	0.392839	0.15811	0.444628	0.137882	0.854324	0.357028	0.108245	0.363335	0.0918727	0.985369	0.228304	0.0755493	0.245891	0.0671138	0.929141
TG 46:3:0	5.42242	1.43955	5.80825	1.36422	0.901456	4.96627	0.914698	4.68992	0.810386	0.877319	2.60553	0.695349	2.48465	0.423395	0.929141
TG 46:2:0	26.8202	5.94151	26.4821	4.91823	0.985369	25.0559	4.25612	21.5569	2.68538	0.488845	12.1131	2.68481	10.7425	1.34092	0.653741
TG 46:1:0	24.5508	5.11968	24.0063	4.17172	0.965529	23.8283	3.90306	19.4212	2.46426	0.22521	11.8568	2.53939	9.98535	1.28565	0.523073
TG 48:5:0	0.0858407	0.0692188	0.0669905	0.07576	0.915075	0.0398539	0.0475937	0.0771777	0.0525863	0.601356	0.0512404	0.0215784	0.0556451	0.025188	0.933616
TG 48:4:0	1.38436	0.493071	1.47936	0.46705	0.929782	1.1939	0.312521	1.14292	0.265863	0.937098	0.70779	0.219094	0.704484	0.202068	0.991494
TG 48:3:0	17.596	4.72206	17.42	3.97343	0.985369	14.4438	2.70057	12.5658	2.09774	0.594084	6.67018	1.56434	5.84477	0.91941	0.653741
TG 48:2:0	30.1392	7.61209	31.3947	6.2682	0.937098	26.5258	4.36422	23.1238	2.91167	0.533683	12.3252	2.46913	10.648	1.3631	0.559543
TG 48:1:0	18.5608	4.08914	19.0135	3.31513	0.964643	16.9433	2.56586	13.8911	1.66477	0.204871	7.9148	1.48055	6.62741	0.888148	0.444258
TG 50:5:0	0.388337	0.175212	0.410074	0.126565	0.960683	0.284564	0.0834541	0.280011	0.0732751	0.985369	0.146264	0.0447252	0.149911	0.0504541	0.98251
TG 50:4:0	2.88622	1.14682	3.05576	0.889747	0.942469	2.24554	0.649537	2.11864	0.476524	0.929141	1.25565	0.354008	1.19786	0.334818	0.942229
TG 50:3:0	16.3137	4.73485	17.0244	3.88397	0.942469	13.0689	2.34246	11.6323	1.68011	0.618378	6.23877	1.35439	5.49433	0.927097	0.654902
TG 50:2:0	26.1515	6.77667	27.6357	5.62297	0.929141	20.4098	3.43257	17.7572	2.41383	0.539155	9.1497	1.80303	7.85997	1.10278	0.558625
TG 50:1:0	3.83607	0.777802	4.27713	0.66034	0.677655	3.45858	0.64103	3.00451	0.393609	0.559543	1.52197	0.313835	1.29289	0.145832	0.523073
TG 52:6:0	0.00898136	0.016716	0.0156909	0.0178631	0.8217	0.00159001	0.00449722	0.0023153	0.00443989	0.944222	0.00356901	0.00662294	0.00809639	0.00982727	0.738414
TG 52:5:0	0.302553	0.152477	0.33994	0.08751	0.890433	0.223182	0.0814468	0.218158	0.0566107	0.984457	0.143576	0.0463616	0.160478	0.068301	0.89475
TG 52:4:0	1.56454	0.652451	1.75674	0.346036	0.842735	1.22821	0.382446	1.12054	0.224063	0.858144	0.792572	0.250431	0.828847	0.311532	0.963181
TG 52:3:0	5.39762	1.6057	5.94805	1.0817	0.811777	4.18266	0.775218	3.77895	0.477483	0.66318	2.35579	0.548628	2.20679	0.479338	0.89475
TG 52:2:0	5.02359	1.28967	5.72173	0.890827	0.66318	3.8491	0.662357	3.41637	0.380523	0.578423	2.07779	0.489922	1.94774	0.347218	0.886663
TG 52:1:0	0.843655	0.180345	0.9998	0.232616	0.600111	0.713731	0.143722	0.596973	0.119755	0.548413	0.376505	0.105283	0.375979	0.0699209	0.997075
TG 54:8:0	0	0	0.00117679	0.00332847	0.738414	0	0	0.000479546	0.00135636	0.738414	0	0	0	0
TG 54:7:0	0	0	0.0179459	0.0356345	0.6094	0	0	0	0		0	0	0.0018847	0.00533074	0.738414
TG 54:6:0	0.00701484	0.0131266	0.118751	0.205574	0.598755	0.00240696	0.0068079	0.0100992	0.0285648	0.841866	0.00431992	0.0122186	0.0255842	0.0723631	0.807707
TG 54:5:0	0.0865722	0.0599934	0.240581	0.299537	0.6094	0.0390739	0.0402874	0.0571755	0.0818312	0.901456	0.0478114	0.0425828	0.155597	0.189082	0.590525
TG 54:4:0	0.215967	0.0822164	0.365301	0.19954	0.488845	0.203543	0.100165	0.16504	0.0697152	0.770866	0.172271	0.0697957	0.235673	0.174218	0.756025
TG 54:3:0	0.488681	0.126521	0.726379	0.272526	0.398697	0.454175	0.142373	0.37112	0.111736	0.653741	0.372776	0.118115	0.457982	0.27962	0.811777
TG 54:2:0	0.447677	0.0944986	0.607428	0.115168	0.160545	0.381504	0.0795692	0.344544	0.0556188	0.738414	0.302295	0.0628757	0.327353	0.0732323	0.842735
TG 54:1:0	0.200772	0.0609312	0.288669	0.0998193	0.444258	0.21169	0.0563566	0.167997	0.0749855	0.646608	0.140351	0.0450973	0.173339	0.0625461	0.680102
TG 56:6:0	0	0	0	0		0	0	0	0		0	0	0	0
TG 56:5:0	0.00143047	0.00318584	0.00338926	0.00681537	0.842735	0.000239089	0.000466385	0.00127804	0.00278491	0.738414	0.000562069	0.000848723	0.000157251	0.000303972	0.662469
TG 56:4:0	0.016924	0.00706209	0.0255573	0.0239154	0.747113	0.0106662	0.00428359	0.00886403	0.00710863	0.886663	0.00909265	0.00706454	0.0157919	0.0123429	0.639741
TG 56:3:0	0.0179294	0.0160429	0.0285611	0.0327656	0.807707	0.0182129	0.008622	0.012661	0.0115639	0.738414	0.0176201	0.0115813	0.031235	0.0164968	0.507202
TG 56:2:0	0.0271705	0.0299911	0.0483533	0.0553405	0.757634	0.0454923	0.0237923	0.031109	0.0282282	0.738414	0.0452332	0.031315	0.0764315	0.0281521	0.445469
TG 56:1:0	0.0210023	0.0238026	0.0413124	0.0505189	0.738414	0.0428445	0.0289206	0.0259162	0.0329953	0.738414	0.01924	0.0214838	0.0341819	0.0414723	0.770866
TG 58:4:0	0.00262853	0.00267272	0.00784136	0.0102582	0.62284	0.00133793	0.00149047	0.00142146	0.00142545	0.985369	0.00163727	0.00153725	0.00327535	0.00387687	0.738218
TG 58:3:0	0.00945031	0.0124398	0.0182253	0.0217655	0.746535	0.0134759	0.00684881	0.00808414	0.00730939	0.600111	0.00591088	0.00665526	0.0130632	0.0154358	0.682012
TG 58:2:0	0.0127453	0.0157487	0.0270668	0.0311349	0.707897	0.0345271	0.0239717	0.0219175	0.0190753	0.707292	0.020084	0.0178071	0.0267085	0.0189647	0.853068
TG 58:1:0	0.0112842	0.0144054	0.0235047	0.0285619	0.738414	0.0345498	0.0231716	0.0208842	0.0223437	0.682012	0.0156826	0.0178845	0.0255149	0.0192769	0.738414
TG 60:4:0	0.000835986	0.000973127	0.00317108	0.00460044	0.620075	0.00070079	0.00098516	0.000747086	0.000893304	0.985369	0.00102199	0.00091863	0.00168771	0.00188497	0.770866
TG 60:3:0	0.010225	0.00617409	0.0159792	0.00958471	0.6094	0.0184632	0.00878323	0.0146656	0.00671341	0.752387	0.0103086	0.00568653	0.0114166	0.00409852	0.929141
TG 60:2:0	0.0243296	0.0125243	0.0366409	0.0166098	0.559543	0.0498768	0.0262489	0.0386467	0.0190798	0.747113	0.0282251	0.0156515	0.0265491	0.0106101	0.963181
TG 60:1:0	0.0101797	0.00580172	0.0165477	0.0109493	0.6094	0.0246195	0.0143822	0.0169852	0.00998525	0.671797	0.0130516	0.00983199	0.0132232	0.006634	0.989569
Ergosterol	9.55937	1.0662	6.17002	0.548238	0.000113	13.856	2.01505	6.8827	0.491981	1.6e-05	14.7394	2.2171	9.01647	1.09215	0.000797
Brassicasterol	0.413675	0.138639	0.232303	0.0606103	0.097113	0.690638	0.267628	0.250824	0.0692233	0.021726	0.781372	0.296654	0.431288	0.138681	0.160545
bSitosterol	1.1376	0.0946579	0.552139	0.0606807	<0,000001	1.9471	0.201804	0.570684	0.0425386	<0,000001	2.51144	0.322437	0.782489	0.0701236	<0,000001
Camposterol	0.601237	0.041833	0.331606	0.0350768	<0,000001	0.904272	0.0521878	0.34835	0.0320569	<0,000001	1.10793	0.157675	0.515161	0.0619625	1.1e-05
Cholesterol	0	0	0.0287692	0.0813716	0.738414	0	0	0.0295422	0.055497	0.600111	0.0760772	0.148819	0	0	0.6094
Desmo-/Zymosterol	0.355144	0.380269	0.173904	0.186558	0.680102	0.764449	0.819621	0.211618	0.226838	0.533683	0.880997	0.945133	0.492532	0.529239	0.738414
Lanosterol	0.0308595	0.0332166	0.0442394	0.0678421	0.925605	0.01943	0.0212827	0.0231086	0.0251611	0.949293	0.0305814	0.0366463	0.0410509	0.0493985	0.929141
Stigmasterol	0.302533	0.0192287	0.216588	0.0279881	0.00036	0.400113	0.0247587	0.221268	0.0201183	<0,000001	0.518742	0.0956654	0.301211	0.030359	0.001483
